# Supplementary material for: Ultra-low temperature direct reconstruction of biomass fermentation of ethanol to higher alcohols in water over thermostable hcp-Ni
Source: Royal Society of Chemistry journal article supplement (doi:10.1039/d3gc04861f), 2024-01-01
Supplement: d3gc04861f1.pdf [file d3gc04861f1.pdf]

## Supporting Information

### Ultra-low Temperature Direct reconstruction of Biomass Fermentation Ethanol to Higher Alcohols in Water over Thermostable Hcp-Ni

Xinqi Zheng<sup>a</sup>, Bo Chen<sup>a</sup>, Juweng Gu<sup>a</sup>, Songbai Qiu<sup>a,b,c</sup>, Xiaoping Wu<sup>a,b,c</sup>, Qian  
Zhang<sup>a,b,c,\*</sup>, Tiejun Wang<sup>a,b,c,\*</sup>

<sup>a</sup> School of Chemical Engineering and Light Industry, Guangdong University of Technology, Guangzhou, China, 510006.

<sup>b</sup> Guangdong Provincial Key Laboratory of Plant Resources Biorefinery, Guangdong University of Technology, Guangzhou, China, 510006.

<sup>c</sup> Jieyang Branch of Chemistry and Chemical Engineering Guangdong Laboratory, Jieyang 515200, China.

\* Corresponding authors: zhangqian@gdut.edu.cn (Q. Zhang), tjwang@gdut.edu.cn (T. Wang)

**Table S1.** Chemical compositions and textural properties of the catalysts.

| Catalysts            | BET Area (m <sup>2</sup> /g) | Pore Size (nm) | Ni (wt%) | N (wt%) | Particle size (nm) |
|----------------------|------------------------------|----------------|----------|---------|--------------------|
| hcp/fcc-Ni@C-1/1-450 | 59                           | 5.1            | 78.8     | 2.7     | 10.0               |
| hcp/fcc-Ni@C-1/2-450 | 191                          | 2.8            | 47.9     | 5.6     | 4.62               |
| hcp/fcc-Ni@C-1/4-450 | 158                          | 2.5            | 26.5     | 7.9     | 3.22               |
| hcp/fcc-Ni@C-1/2-400 | 49                           | 5.3            | 44.7     | 7.1     | 4.13               |
| hcp/fcc-Ni@C-1/2-500 | 187                          | 2.8            | 54.9     | 5.2     | 4.31               |
| hcp/fcc-Ni@C-1/2-600 | 175                          | 3.0            | 62.9     | 4.2     | 5.53               |

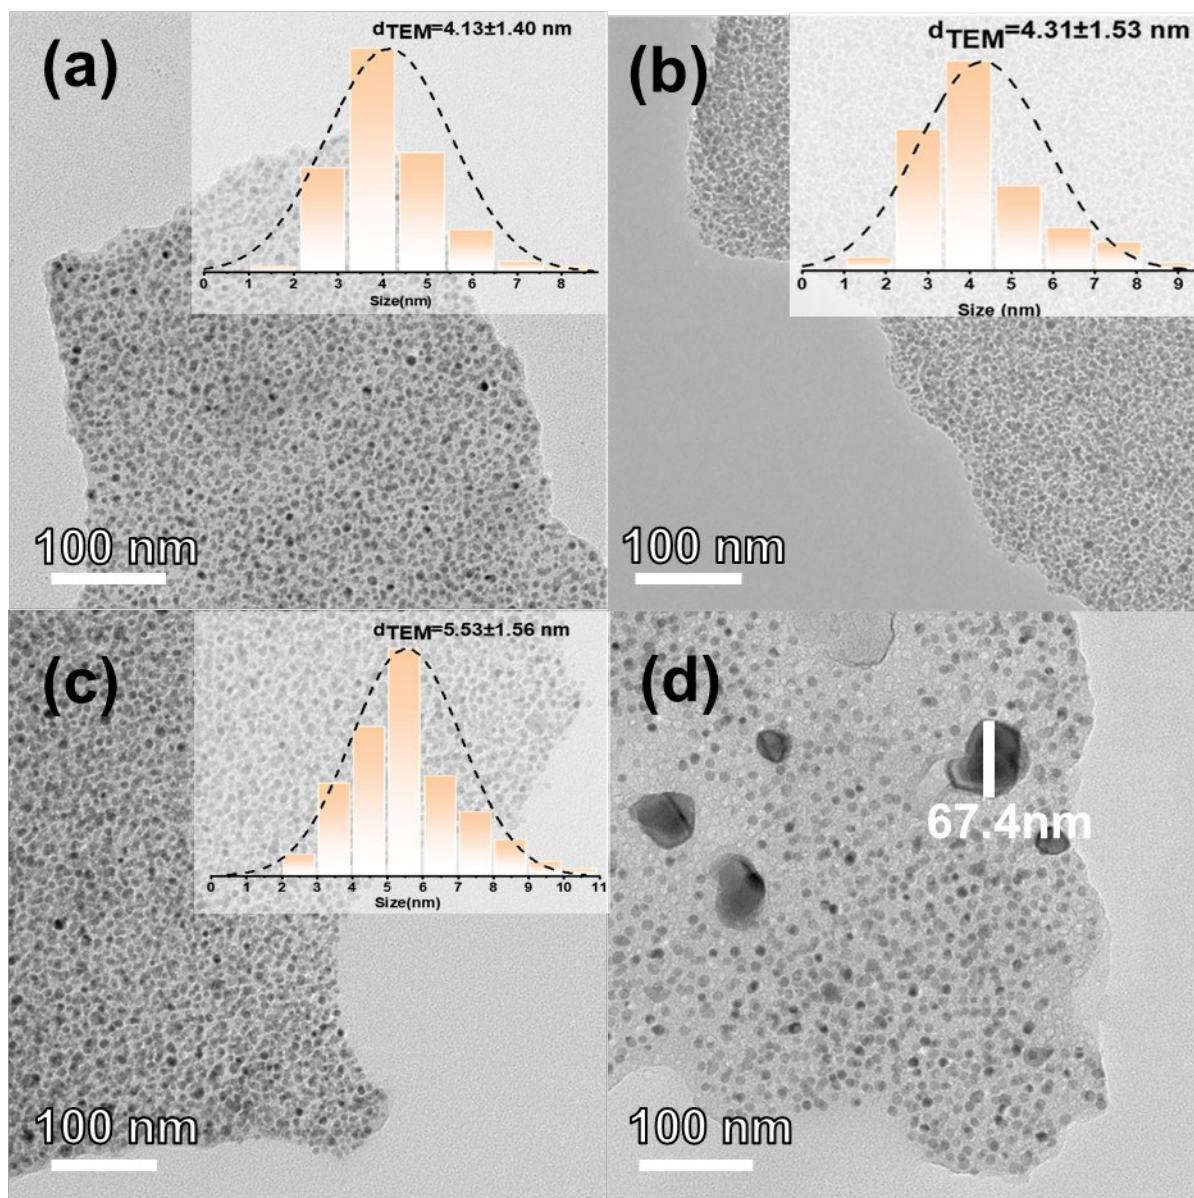

Figure S1. TEM image of hcp/fcc-Ni@C-1/2-T ( $T=400$  °C,  $500$  °C,  $600$  °C,  $700$  °C)

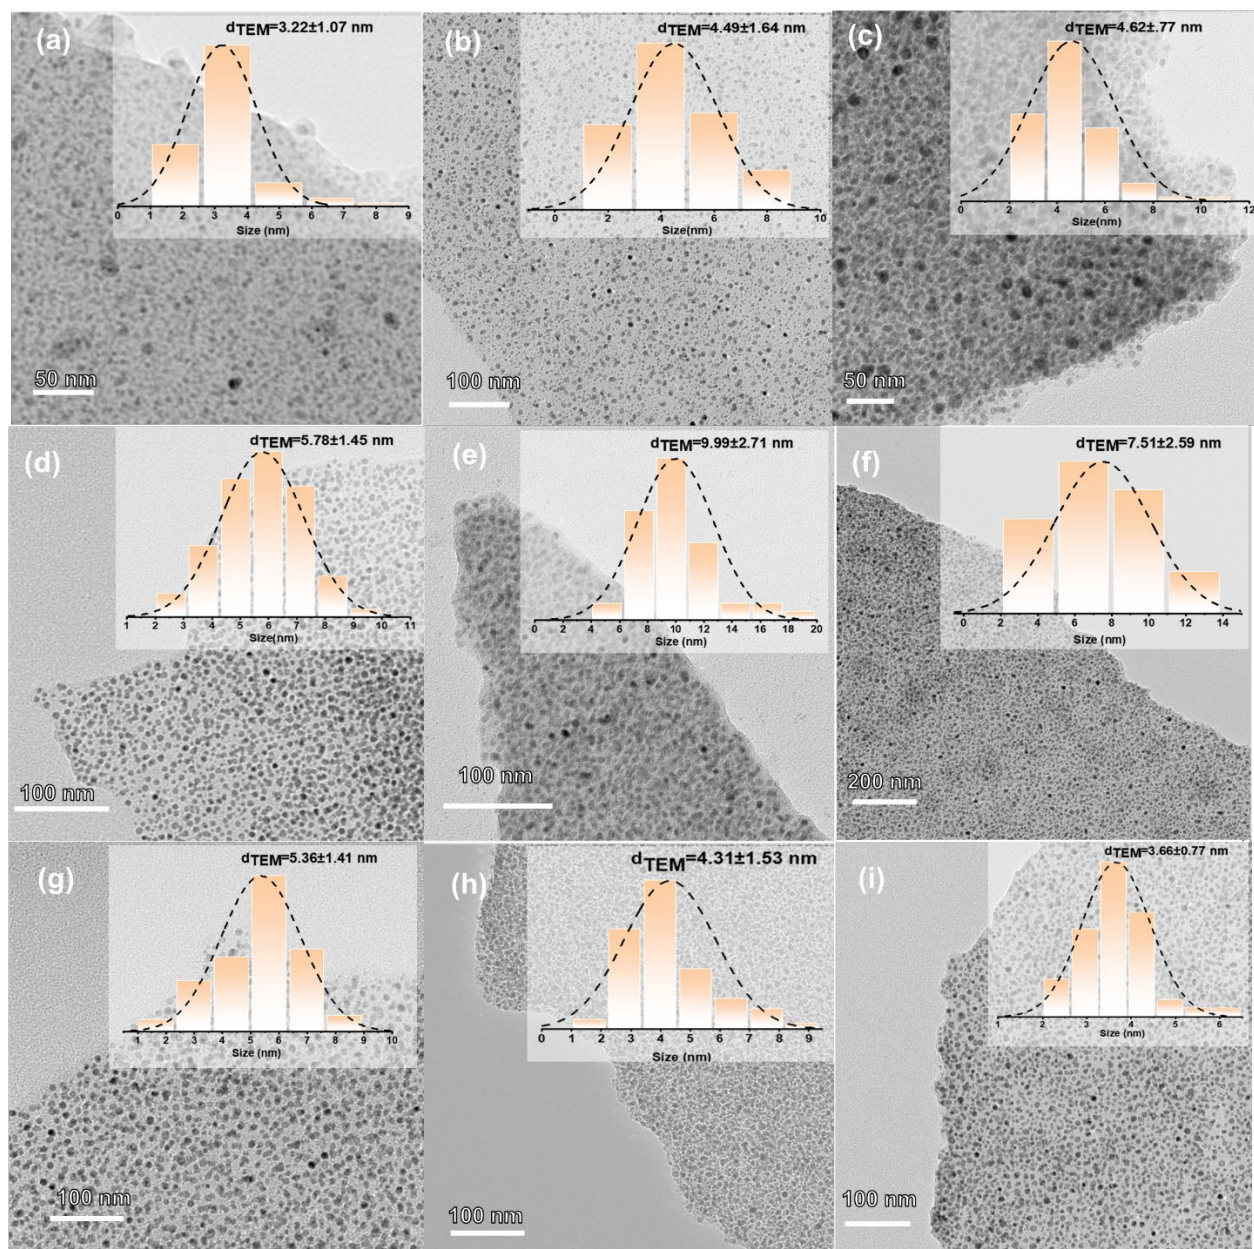

**Figure S2.** (a-e) TEM image of hcp/fcc-Ni@C-X-450 (1/4, 1/3, 1/2, 1/1.5, 1/1); (f-i) TEM image of hcp/fcc-Ni@C-1/2-500 with different molecular weight of PVP ( $M_w=8000$ , 24000, 58000, 1300000)



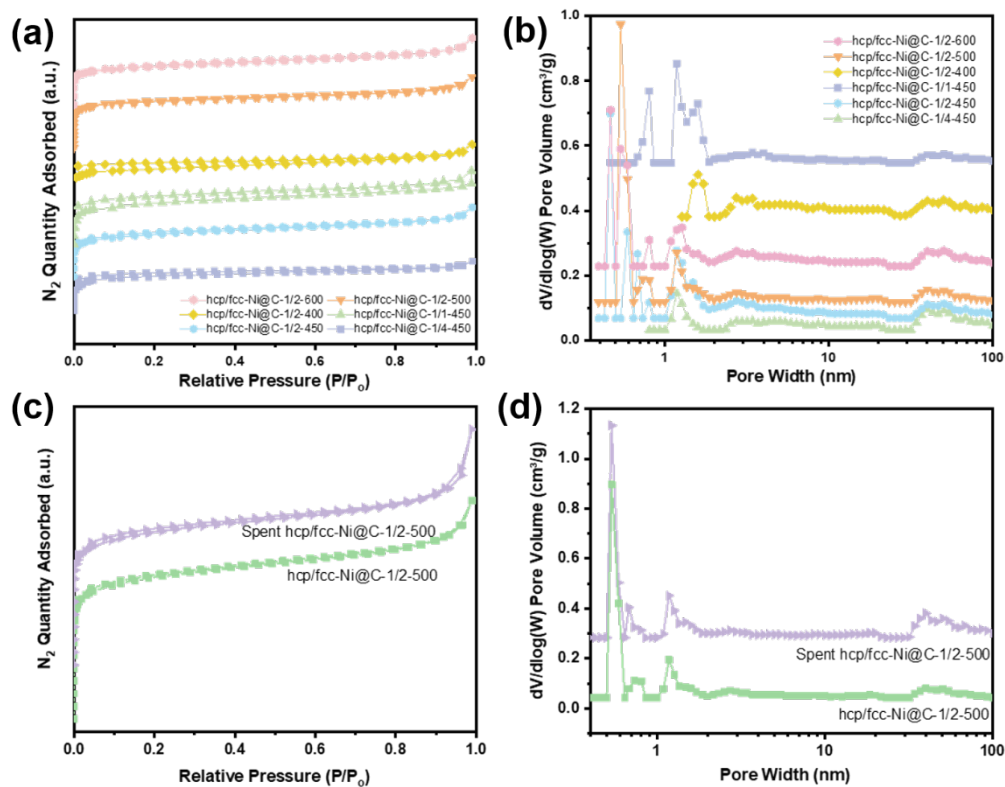

**Figure S3.** (a) N<sub>2</sub> adsorption/desorption isotherms and (b) pore distributions of hcp/fcc-Ni@C-X-T (X=1/1, 1/2, 1/4; T=400, 450, 500, 600); (c) N<sub>2</sub> adsorption/desorption isotherms and (d) pore distributions of fresh and spent hcp/fcc-Ni@C-1/2-500.

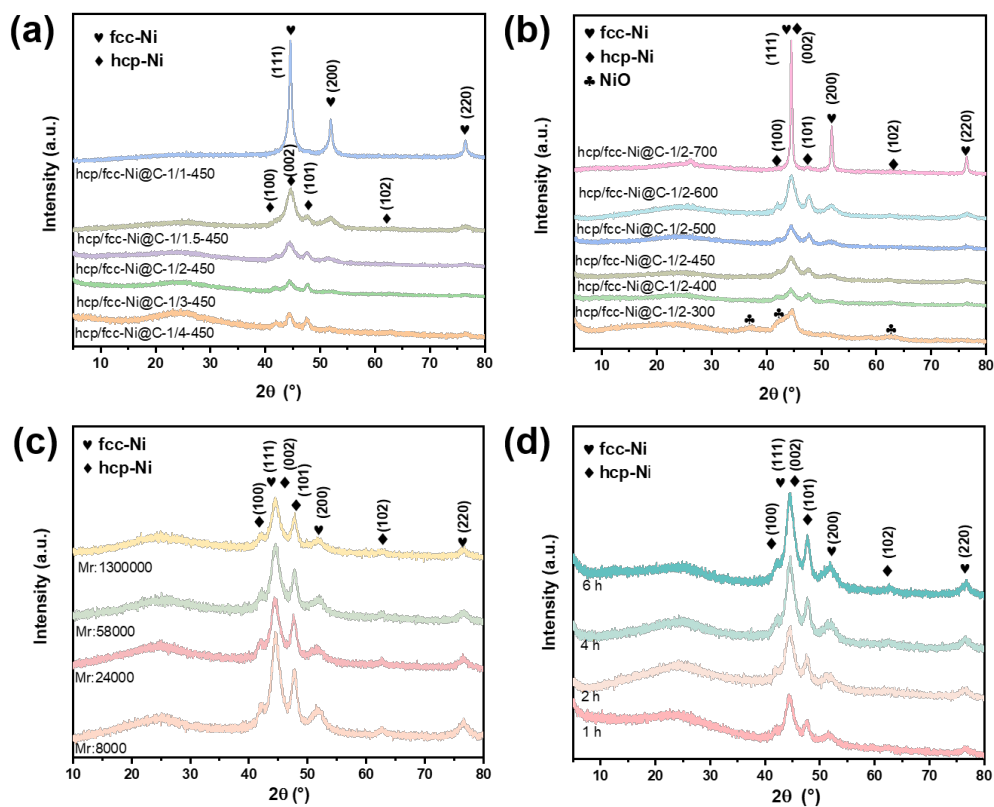

**Figure S4.** The XRD patterns and XPS spectra of hcp/fcc-Ni@C-X-T catalysts: (a) hcp/fcc-Ni@C-X-450 catalysts with different Ni/PVP molar ratio, (b) hcp/fcc-Ni@C-1/2-T catalysts prepared with different carbonization temperature, (c) hcp/fcc-Ni@C-1/2-500 catalysts with different molecular weight of PVP; (d) hcp/fcc-Ni@C-1/2-500 catalysts with different carbonization duration from 1h to 6h.

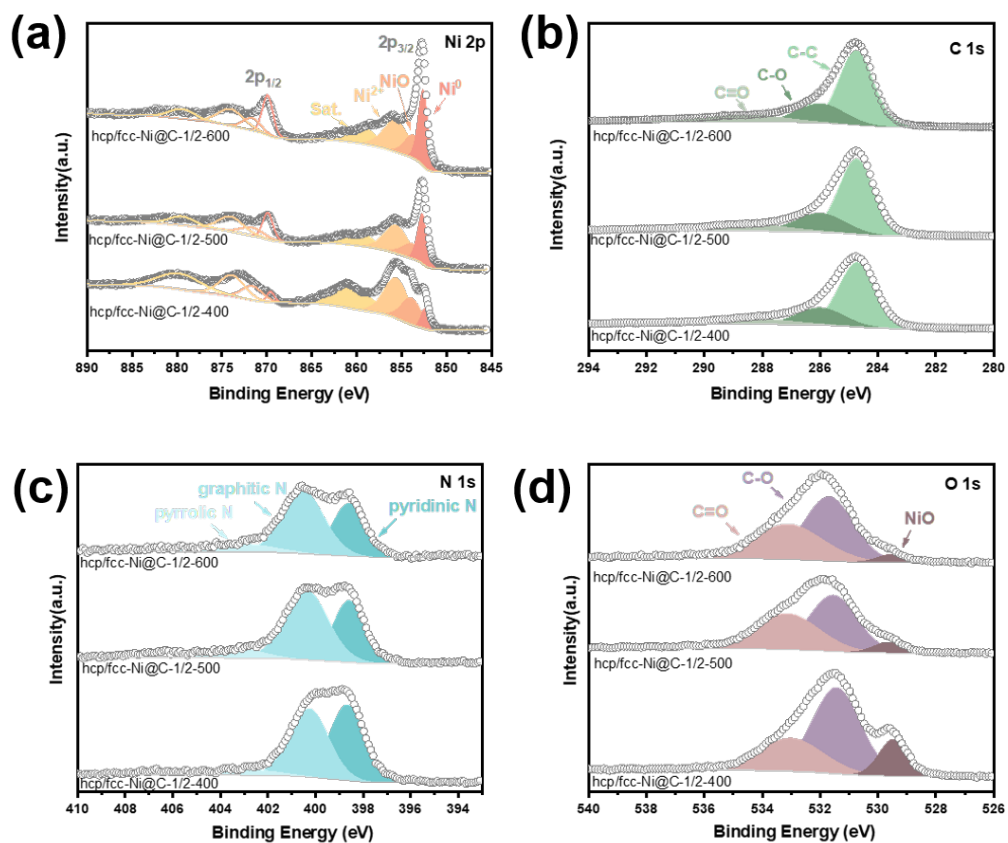

**Figure S5.** XPS spectra of hcp/fcc-Ni@C-1/2-T catalysts synthesized under different carbonization temperatures: (a) Ni 2p spectra, (b) C 1s spectra, (c) N 1s spectra, (d) O 1s spectra.

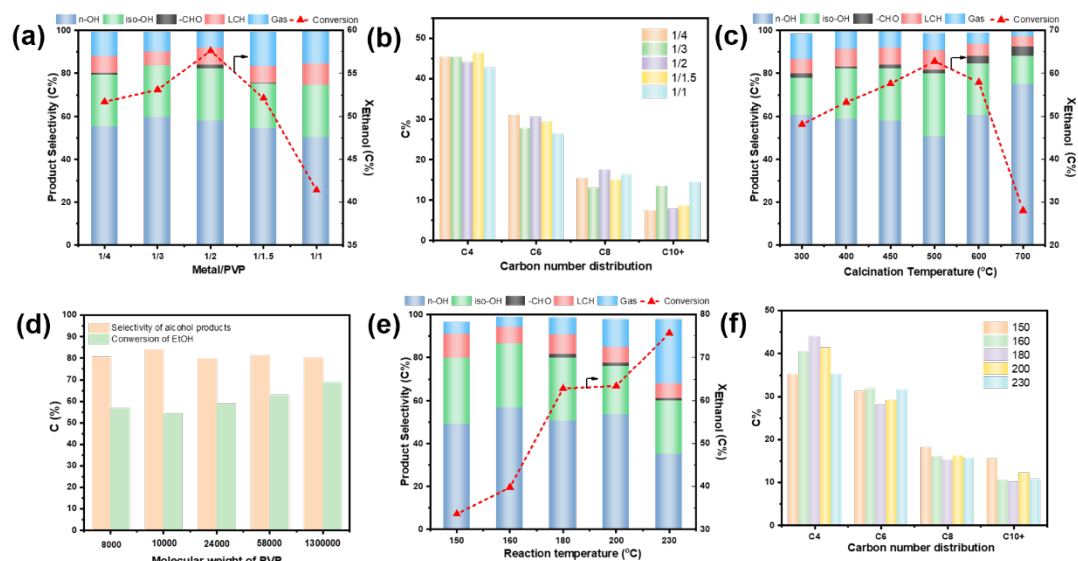

**Figure S6.** Overall catalytic performance of ethanol aqueous reconstruction over hcp/fcc-Ni@C catalysts (Reaction conditions: 0.3 g catalysts, 0.87 g NaOH, 20g fermentation ethanol solution (50 wt.%); 180 °C, 12 h): (a) hcp/fcc-Ni@C-X-450 catalysts, (b) carbon number distribution of (a), (c) hcp/fcc-Ni@C-1/2-T catalysts, (d) hcp/fcc-Ni@C-1/2-500 catalysts with different molecular weight of PVP. (e) Catalytic performances of hcp/fcc-Ni@C-1/2-500 catalysts under different reaction temperatures (Reaction conditions: 0.3 g catalysts, 0.87 g NaOH, 20g fermentation ethanol solution (50 wt.%), 150-230 °C, 12 h. (f) carbon number distribution of (e).

**Table S2.** Catalytic performance of ethanol aqueous reconstruction over hcp/fcc-Ni@C-1/2-500 catalysts for 10 recycle runs.

| Recycle | Conversion (%) | Carbon balance (%) | Selectivity |        |     |      |      |       |
|---------|----------------|--------------------|-------------|--------|-----|------|------|-------|
|         |                |                    | n-OH        | iso-OH | CHO | LCH  | Gas  | Other |
| 1       | 62.8           | 86.0               | 50.5        | 29.4   | 1.7 | 9    | 8    | 1.4   |
| 2       | 62.9           | 90.8               | 49.2        | 27.8   | 1.5 | 9.6  | 10.4 | 1.5   |
| 3       | 63.8           | 84.9               | 49          | 28.1   | 2   | 10.9 | 8.5  | 1.5   |
| 4       | 64.5           | 88.7               | 49.5        | 28     | 2.3 | 8.5  | 9.5  | 2.2   |
| 5       | 65.7           | 85.6               | 48.1        | 31.1   | 2.7 | 9.6  | 7.1  | 1.3   |
| 6       | 65.7           | 85.3               | 48.6        | 31.6   | 1.8 | 9.8  | 7.2  | 0.9   |
| 7       | 64.5           | 84.9               | 49.4        | 31.1   | 1.4 | 9.5  | 7.5  | 1.1   |
| 8       | 67.2           | 86.4               | 47.8        | 31.8   | 1.6 | 9.5  | 8.3  | 1     |
| 9       | 67.8           | 85.9               | 47.2        | 32.3   | 2   | 9.5  | 7.1  | 1.9   |
| 10      | 65.9           | 87.6               | 45.6        | 32.3   | 3.3 | 10.5 | 6.5  | 1.9   |

(Reaction conditions: 0.3 g catalysts, 0.87 g NaOH, 20g fermentation ethanol solution (50 wt.%), 180 °C for 12 h. *n*/*iso*-OH: C4+ *n*/*iso*-alcohol, -CHO: C4+ aldehyde, LCH: C6+ hydrocarbons, Gas: H<sub>2</sub>, and C1-C4 hydrocarbons)

**Table S3.** Comparison of catalytic activities in aqueous ethanol reconstruction over hcp/fcc-Ni@C-1/2-500 catalysts, fcc-Ni@C-1/2-500 catalysts and commercial noble metal catalysts

| Catalyst     | Conversion (%) | Carbon balance (%) | Selectivity |        |     |     |     |       |
|--------------|----------------|--------------------|-------------|--------|-----|-----|-----|-------|
|              |                |                    | n-OH        | iso-OH | CHO | LCH | Gas | Other |
| 5% Pd/C      | 27.1           | 90.0               | 36.7        | 40.2   | 0   | 23  | 0   | 0.1   |
| 5% Pt/C      | 9.7            | 91.4               | 73.3        | 26     | 0   | 0   | 0.8 | 0     |
| 5% Ru/C      | 18.6           | 98.0               | 47.9        | 5      | 0   | 0   | 47  | 0     |
| fcc-Ni@C     | 38.5           | 92.5               | 60.6        | 23     | 2.5 | 7.1 | 6.8 | 0     |
| hcp/fcc-Ni@C | 52.3           | 90.8               | 52.4        | 30.5   | 6.5 | 9.4 | 0.8 | 0.4   |

(Reaction conditions: 0.3 g catalysts, 0.87 g NaOH, 10g fermentation ethanol solution (50 wt.%), 130 °C for 36 h)

**Table S4.** Evaluation of hcp/fcc-Ni@C-1/2-500 catalysts activity at near-ambient temperatures with prolonged reaction time.

| Reaction temperature (°C) | Reaction time (h) | Conversion (%) | Carbon balance (%) | Selectivity |                 |           |             |     |
|---------------------------|-------------------|----------------|--------------------|-------------|-----------------|-----------|-------------|-----|
|                           |                   |                |                    | n-butanol   | 2-ethyl butanol | n-hexanol | C8+ alcohol | Gas |
| 80                        | 36                | 5.9            | 94.4               | 99.9        | 0               | 0         | 0           | 0.1 |
|                           | 72                | 9.1            | 99.0               | 62          | 37.7            | 0         | 0           | 0.3 |
|                           | 108               | 11.7           | 95.3               | 53          | 24.7            | 17.9      | 0           | 0.4 |
| 100                       | 36                | 9.1            | 95.4               | 43.96       | 21.05           | 11.08     | 23.91       | 0.2 |
|                           | 72                | 13             | 91.7               | 51.45       | 16.87           | 9.26      | 22.42       | 0.6 |
|                           | 108               | 17.6           | 92.1               | 50.25       | 15.94           | 8.5       | 24.66       | 0.9 |

(Reaction conditions: 0.3 g catalysts, 0.87 g NaOH, 10g fermentation ethanol solution (50 wt.%))

**Table S5.** Evaluation of hcp/fcc-Ni@C-1/2-500 catalysts activity at near-ambient temperature with different concentration of ethanol solution.

| Content of EtOH | Conversion (%) | Carbon balance (%) | Selectivity |                 |           |             |      |
|-----------------|----------------|--------------------|-------------|-----------------|-----------|-------------|------|
|                 |                |                    | n-butanol   | 2-ethyl butanol | n-hexanol | C8+ alcohol | Gas  |
| 3%              | 1.2            | 98.0               | 100         | 0               | 0         | 0           | 0    |
| 10%             | 3.1            | 98.2               | 100         | 0               | 0         | 0           | 0    |
| 20%             | 4.6            | 96.5               | 62          | 37.7            | 0         | 0           | 0.05 |
| 40%             | 7.8            | 93.2               | 53          | 24.7            | 17.9      | 0           | 0.3  |

(Reaction conditions: 0.9 g catalysts, 0.87 g NaOH, fermentation ethanol solution (3-40 wt.%), 80 °C for 72 h)



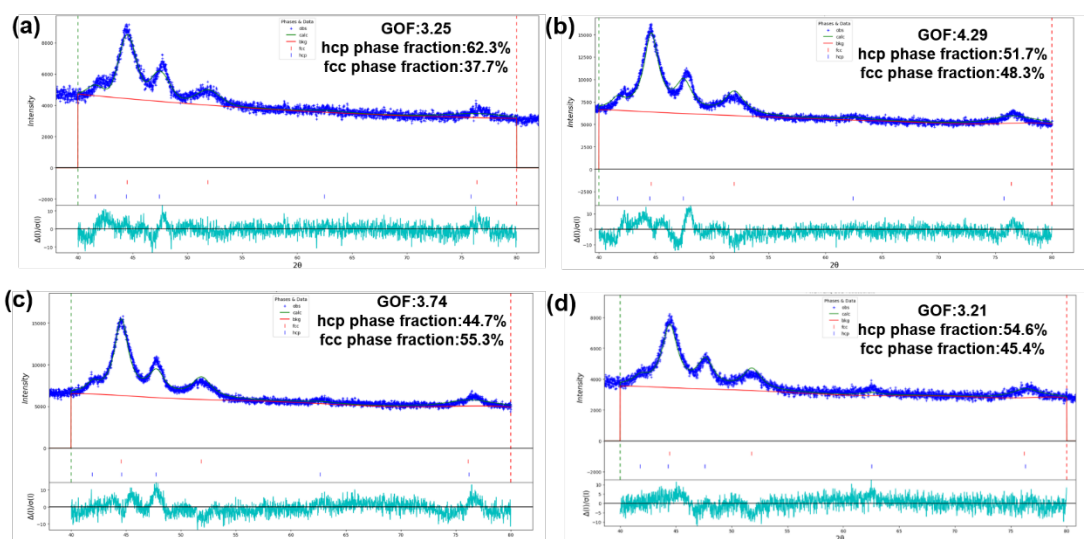

**Figure S7.** Rietveld refined XRD pattern of hcp/fcc-Ni@C-500 of different calcination time in N<sub>2</sub>: (a) 1h, (b) 4h, (c) 6h,; (d) Rietveld refined XRD pattern of spent hcp/fcc-Ni@C-500 after 10 cycles. The legends are: Obs (observed) and Calc (calculated) patterns, diff (difference) plot between Obs and Calc), and bck (background plot).

**Table S6.** Chemical compositions and textural properties of the spent catalysts.

| Samples                    | BET Area (m <sup>2</sup> /g) | Pore Size (nm) | hcp-Ni content (%) |
|----------------------------|------------------------------|----------------|--------------------|
| spent-hcp/fcc-Ni@C-1/2/500 | 176                          | 3.2            | 54.6               |
| hcp/fcc-Ni@C-1/2/500       | 187                          | 2.8            | 60.7               |

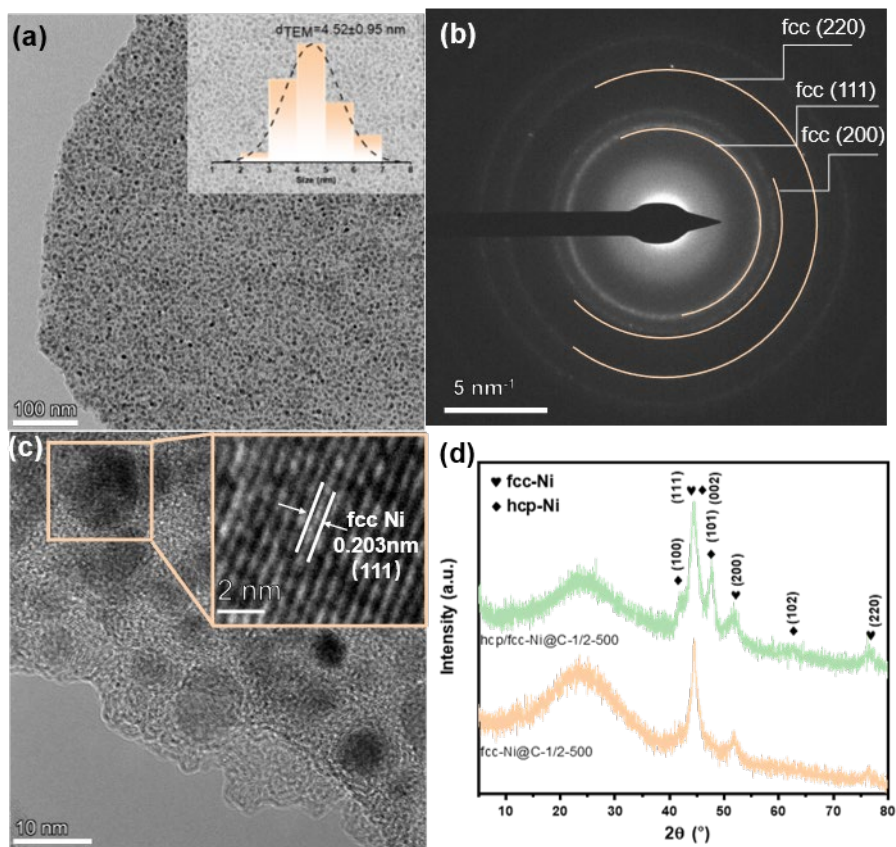

**Figure S8.** (a) TEM image of fcc-Ni@C-1/2-500; (b) SAED pattern corresponding to (a); (c) HR-TEM image of fcc-Ni@C-1/2-500; (d) The XRD patterns of hcp/fcc-Ni@C-1/2-500 and fcc-Ni@C-1/2-500.

**Table S7.** Catalytic activities of ethanol upgrading to higher alcohols in reported researches.

| Catalyst                                                      | Reaction temperature(°C) | EtOH Conv. (C%) | C4+ alcohol Selectivity (C%) | Reference                                                          |
|---------------------------------------------------------------|--------------------------|-----------------|------------------------------|--------------------------------------------------------------------|
| 1.04wt% Ru/Mg <sub>3</sub> Al <sub>1</sub> -LDO-P-A.          | 350                      | 29.6            | 82.6                         | Applied Catalysis B-Environmental,2022. 309.                       |
| Co <sub>0.15</sub> Mg <sub>2.85</sub> AlO <sub>x</sub>        | 250                      | 32.9            | 95.4                         | Green Chemistry,2023. 25: 2653-2662.                               |
| Cu <sub>1</sub> Ni <sub>7</sub> -PMO                          | 320                      | 47.9            | 72                           | ACS Sustainable Chemistry & Engineering,2017. 5: 1738-1746.        |
| [Ru]-6                                                        | 150                      | 73.4            | 100                          | J Am Chem Soc,2016. 138: 9077-9080.                                |
| [Mn]-1                                                        | 160                      | 11.2            | 92                           | J Am Chem Soc,2017. 139: 11941-11948.                              |
| Ru-5                                                          | 130                      | 49              | 96                           | ACS Catalysis,2023. 13: 5449-5455.                                 |
| BAP-0.25Ni                                                    | 200                      | 55.6            | 90.3                         | ACS Sustainable Chemistry & Engineering,2022. 10: 3466-3476.       |
| Cu-HAP                                                        | 250                      | 36.6            | 86.7                         | Green Chemistry, Journal of Energy Chemistry,2022. 72: 306-317.    |
| Cu-NiMgAlO                                                    | 250                      | 30              | 64.2                         | Journal of Energy Chemistry,2022. 72: 306-317.                     |
| CuMgAl (LDH)                                                  | 325                      | 59.3            | 82                           | ACS Catalysis,2022. 12: 12045-12054.                               |
| Ni-MgAlO                                                      | 275                      | 18.7            | 85                           | Journal of Catalysis,2016. 344: 184-193.                           |
| Ni-TiO <sub>2</sub>                                           | 210                      | 49.2            | 69.7                         | ChemistrySelect,2020. 5: 8669-8673.                                |
| 10%Ni15%CeO <sub>2</sub> /AC                                  | 250                      | 27.2            | 85.6                         | Industrial & Engineering Chemistry Research,2020. 59: 22057-22067. |
| [Ru(bipy <sup>OH</sup> )]                                     | 80                       | 28              | 57                           | Organometallics,2021. 40: 1884-1888.                               |
| [(RPNP)-MnBr(CO) <sub>2</sub> ] ( R = iPr, Cy, tBu, Ph or Ad) | 150                      | 50              | 50                           | ACS Catalysis,2018. 8: 997-1002.                                   |
| Sn-Ni/CS                                                      | 230                      | 60              | 86.4                         | Applied Catalysis B-Environmental,2023. 321.                       |
| NiSn/MgAlO                                                    | 250                      | 66.9            | 93.8                         | ACS Sustainable Chemistry & Engineering,2021. 9: 11269-11279.      |
| NiSn@C(CA)                                                    | 250                      | 48.1            | 90.8                         | Energy Conversion and Management,2021. 249.                        |
| NiMo@C-3/1                                                    | 240                      | 89.4            | 84.6                         | Chemical Engineering Journal,2023. 461.                            |
| hcp/fcc-Ni@C-1/2-500                                          | 180                      | 62.8            | 79.9                         | This work                                                          |
|                                                               | 130                      | 52.3            | 82.9                         |                                                                    |
|                                                               | 100                      | 17.6            | 100                          |                                                                    |
|                                                               | 80                       | 11.7            | 100                          |                                                                    |

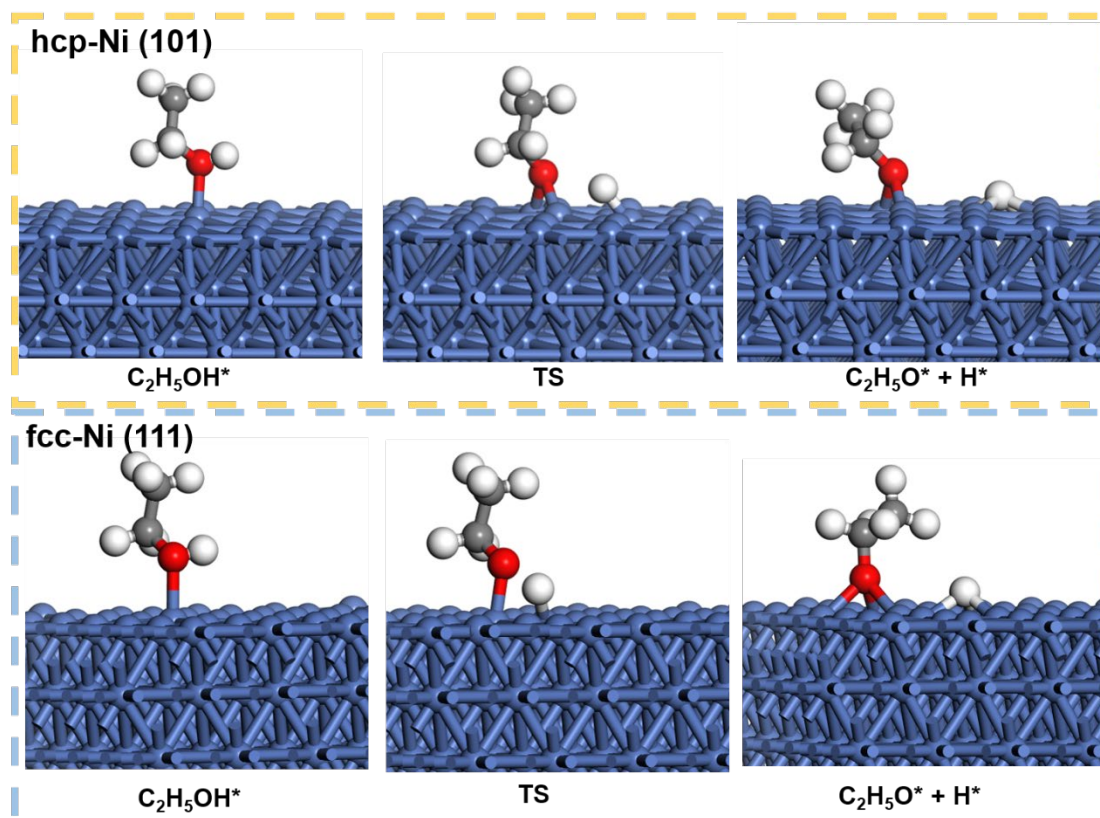

**Figure S9.** Configuration diagrams of  $C_2H_5OH^*$ , transition state (TS) and  $C_2H_5O^* + H^*$  for the dehydrogenation and C-C cleavage of ethanol on the hcp-Ni (101) and fcc-Ni (111) models.

1. B. W. Yuan, J. Zhang, Z. An, Y. R. Zhu, X. Shu, H. Y. Song, X. Xiang, W. N. Wang, Y. S. Jing, L. R. Zheng and J. He, *Appl Catal B-Environ*, 2022, **309**.
2. W.-L. Lv, L. He, W.-C. Li, B.-C. Zhou, S.-P. Lv and A.-H. Lu, *Green Chemistry*, 2023, **25**, 2653-2662.
3. Z. H. Sun, A. C. Vasconcelos, G. Bottari, M. C. A. Stuart, G. Bonura, C. Cannilla, F. Frusteri and K. Barta, *Acs Sustainable Chemistry & Engineering*, 2017, **5**, 1738-1746.
4. Y. Xie, Y. Ben-David, L. J. Shimon and D. Milstein, *J Am Chem Soc*, 2016, **138**, 9077-9080.
5. S. Fu, Z. Shao, Y. Wang and Q. Liu, *J Am Chem Soc*, 2017, **139**, 11941-11948.
6. Z. Ni, R. Padilla, L. dos Santos Mello and M. Nielsen, *ACS Catalysis*, 2023, **13**, 5449-5455.
7. M. Xue, B. Yang, C. Xia and G. Zhu, *ACS Sustainable Chemistry & Engineering*, 2022, **10**, 3466-3476.
8. M. J. G. Mond F. Guo, Heather Job, Carlos Alvarez-Vasco, Senthil Subramaniam, Xiao Zhang, Libor Kovarik, Vijayakumar Murugesan, Steven Phillips, and Karthikeyan K. Ramasamy, *green Chemistry*, DOI: 10.1039/x0xx00000x.
9. Z. Wang, M. Yin, J. Pang, X. Li, Y. Xing, Y. Su, S. Liu, X. Liu, P. Wu, M. Zheng and T. Zhang, *Journal of Energy Chemistry*, 2022, **72**, 306-317.
10. B.-C. Zhou, W.-C. Li, W.-L. Lv, S.-Y. Xiang, X.-Q. Gao and A.-H. Lu, *ACS Catalysis*, 2022, **12**, 12045-12054.
11. J. Pang, M. Zheng, L. He, L. Li, X. Pan, A. Wang, X. Wang and T. Zhang, *Journal of Catalysis*, 2016, **344**, 184-193.
12. S. Li, X. Zhu, H. An, X. Zhao and Y. Wang, *ChemistrySelect*, 2020, **5**, 8669-8673.

13. Z. Wang, J. Pang, L. Song, X. Li, Q. Yuan, X. Li, S. Liu and M. Zheng, *Industrial & Engineering Chemistry Research*, 2020, **59**, 22057-22067.
14. T. A. DiBenedetto and W. D. Jones, *Organometallics*, 2021, **40**, 1884-1888.
15. N. V. Kulkarni, W. W. Brennessel and W. D. Jones, *ACS Catalysis*, 2018, **8**, 997-1002.
16. B. Chen, X. Q. Zheng, J. W. Gu, S. B. Qiu, J. L. Song, X. P. Wu, H. F. Dong, Q. Zhang and T. J. Wang, *Appl Catal B-Environ*, 2023, **321**.
17. X. Wu, X. Cai, Q. Zhang, P. Bi, Q. Meng, Y. Pi and T. Wang, *ACS Sustainable Chemistry & Engineering*, 2021, **9**, 11269-11279.
18. W. P. Liu, B. Chen, Q. Zhang, S. B. Qiu, X. P. Wu, Q. W. Meng, L. Ma and T. J. Wang, *Energy Conversion and Management*, 2021, **249**.
19. J. Liao, Z. Liu, Y. Ling, Q. Zhang, S. Qiu, J. Gu, J. Li, H. Dong, J. Song and T. Wang, *Chemical Engineering Journal*, 2023, **461**.
